# Supplementary material
Source: Springer Nature journal article supplement (https://www.springermedizin.de/resource/supplementary/12894_2011_187_MOESM1_ESM.pdf/9513146)
Supplement: MOESM1 [file 9513146]

**A**

EGF stimulation (min): 0 30 90 180 240

**UMUC-3**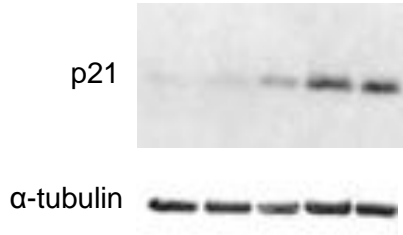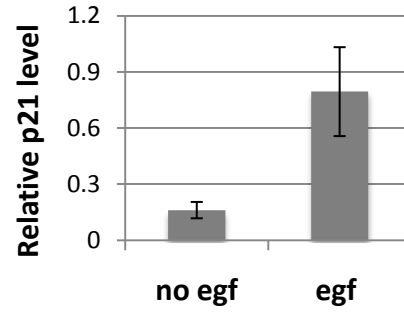**UMUC-3**

EGF stimulation (min): 0 30 90 180

**UMUC-14**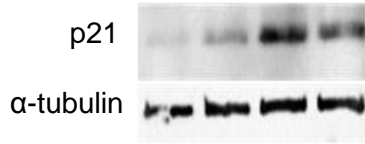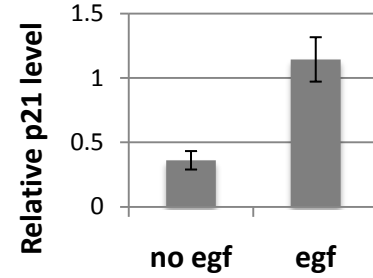**UMUC-14****B**

PDGF

conc. (ng/ml): 0 5 10 25 50 100

p-AKT ser 473

actin

**UMUC-3**

p21

actin

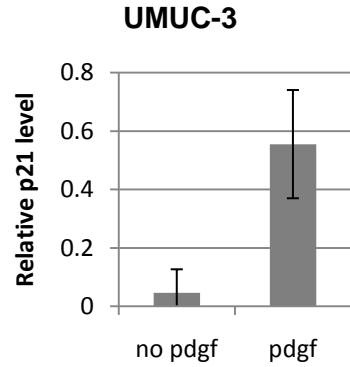**UMUC-3****UMUC-14**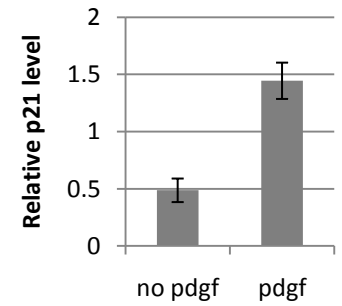**C**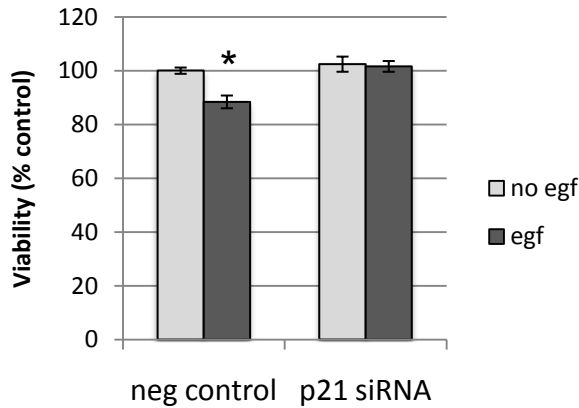

Viability (% control)

 □ no egf  
 ■ egf

neg control p21 siRNA
